# Supplementary material for: Variation in chemical composition and volatility of oxygenated organic aerosol in different rural, urban, and remote environments
Source: Copernicus journal article supplement (doi:10.5194/egusphere-2023-1821), 2023-09-05
Supplement: Supplementary file 1 [file egusphere-2023-1821-supplement.pdf]

## *Supplement for:*

# **Variation in chemical composition and volatility of oxygenated organic aerosol in different rural, urban, and remote environments**

5 Wei Huang<sup>1</sup>, Cheng Wu<sup>2,3</sup>, Linyu Gao<sup>4</sup>, Yvette Gramlich<sup>2,5</sup>, Sophie L. Haslett<sup>2,5</sup>, Joel Thornton<sup>6</sup>,  
Felipe D. Lopez-Hilfiker<sup>7</sup>, Ben H. Lee<sup>6</sup>, Junwei Song<sup>4</sup>, Harald Saathoff<sup>4</sup>, Xiaoli Shen<sup>4,8</sup>,  
Ramakrishna Ramisetty<sup>4,9</sup>, Sachchida N. Tripathi<sup>10</sup>, Dilip Ganguly<sup>11</sup>, Feng Jiang<sup>4</sup>, Magdalena  
Vallon<sup>4</sup>, Siegfried Schobesberger<sup>12</sup>, Taina Yli-Juuti<sup>12</sup>, Claudia Mohr<sup>2,5,13,\*</sup>

10 <sup>1</sup>Institute for Atmospheric and Earth System Research / Physics, Faculty of Science, University of Helsinki, 00014,  
Helsinki, Finland

<sup>2</sup>Department of Environmental Science, Stockholm University, 11418, Stockholm, Sweden

<sup>3</sup>Now at: Department of Chemistry and Molecular Biology, University of Gothenburg, 41296, Gothenburg, Sweden

<sup>4</sup>Institute of Meteorology and Climate Research, Karlsruhe Institute of Technology, 76344, Eggenstein-Leopoldshafen,  
Germany

15 <sup>5</sup>Bolin Centre for Climate Research, Stockholm University, 11418, Stockholm, Sweden

<sup>6</sup>Department of Atmospheric Sciences, University of Washington Seattle, Washington 98195, United States

<sup>7</sup>Tofwerk AG, 3600 Thun, Switzerland

<sup>8</sup>Now at: Department of Earth, Atmospheric, and Planetary Sciences, Purdue University, West Lafayette, Indiana  
47907, United States

20 <sup>9</sup>Now at: TSI Instruments India Private Limited, 560102, Bangalore, India

<sup>10</sup>Department of Civil Engineering, Indian Institute of Technology Kanpur, 208016, Kanpur, India

<sup>11</sup>Centre for Atmospheric Sciences, Indian Institute of Technology Delhi, 110016, New Delhi, India

<sup>12</sup>Department of Technical Physics, University of Eastern Finland, 70211, Kuopio, Finland

25 <sup>13</sup>Now at: Department of Environmental System Science, ETH Zurich and Laboratory of Atmospheric Chemistry, Paul  
Scherrer Institute, 5232 Villigen, Switzerland

\*Correspondence to: Claudia Mohr ([claudia.mohr@psi.ch](mailto:claudia.mohr@psi.ch))

**Table S1.** Campaign-average (average  $\pm$  1 standard deviation) parameters for meteorology, trace gases, equivalent black carbon (eBC), total organics and total PM<sub>2.5</sub>, double bond equivalent (DBE) values, and number of carbon atoms (nC) and oxygen atoms (nO) at different locations and different seasons.

| Name  | T (°C)   | RH (%)    | O <sub>3</sub> (ppbv) | NO <sub>2</sub> (ppbv) | SO <sub>2</sub> (ppbv) | eBC (µg m <sup>-3</sup> ) | Org <sup>a</sup> (µg m <sup>-3</sup> ) | PM <sub>2.5</sub> <sup>a</sup> (µg m <sup>-3</sup> ) | DBE     | nC       | nO      |
|-------|----------|-----------|-----------------------|------------------------|------------------------|---------------------------|----------------------------------------|------------------------------------------------------|---------|----------|---------|
| MCC-t | 0.3±2.1  | 53.0±22.4 | /                     | /                      | /                      | 0.2±0.4                   | 0.3±0.5                                | 1.0±1.8                                              | 3.1±0.2 | 8.4±0.8  | 6.2±0.3 |
| MCC-d | -0.4±1.9 | 52.2±18.8 | /                     | /                      | /                      | 0.3±0.4                   | 0.5±0.5                                | 1.6±1.4                                              | 3.2±0.1 | 7.7±0.7  | 5.8±0.3 |
| REL   | 19.9±3.9 | 76.1±15.2 | 22.7±12.4             | 11.3±5.2               | 1.4±1.0                | 0.7±0.4                   | 3.7±2.1                                | 6.6±4.2                                              | 3.1±0.1 | 9.2±0.8  | 6.6±0.5 |
| RAB   | 24.2±3.2 | 83.1±15.2 | 25.0±12.5             | 0.6±0.6                | 0.2±0.4                | /                         | 4.1±2.5                                | 6.0±3.2                                              | 2.9±0.1 | 8.0±0.4  | 5.7±0.2 |
| RHT   | 8.1±6.1  | 66.0±23.7 | 36.1±10.1             | 0.4±0.6                | 0.2±0.2                | 0.1±0.2                   | 1.6±2.0                                | 2.3±2.3                                              | 3.1±0.1 | 9.1±0.6  | 5.7±0.3 |
| UST-s | 24.6±4.0 | 55.1±12.8 | 29.6±7.5              | 9.7±4.1                | 3.9±2.8                | 1.0±0.3                   | 5.1±3.2                                | 7.1±3.3                                              | 3.4±0.1 | 8.8±0.4  | 6.4±0.2 |
| UST-w | 2.0±3.7  | 61.4±10.1 | 17.1±8.7              | 15.8±3.9               | 1.4±0.8                | 1.2±0.1                   | 8.4±5.6                                | 27.0±11.9                                            | 3.4±0.1 | 8.7±0.9  | 6.7±0.2 |
| UKA-s | 25.9±6.6 | 49.8±21.0 | 37.4±19.8             | 9.6±6.4                | /                      | 0.7±0.4                   | 3.9±2.4                                | 5.9±2.8                                              | 3.6±0.2 | 10.7±0.8 | 7.0±0.4 |
| UKA-w | 13.2±3.3 | 56.4±13.4 | 27.8±10.0             | 9.2±7.1                | 0.6±1.0                | 0.5±0.5                   | 1.9±1.6                                | 3.9±3.6                                              | 3.5±0.1 | 11.2±0.8 | 7.1±0.4 |
| UDL   | 16.8±4.1 | 73.3±16.7 | 11.1±13.3             | 34.6±22.0              | /                      | 16.1±13.3                 | 86.4±66.7                              | 172.7±103.8                                          | 4.0±0.2 | 9.4±0.4  | 4.9±0.1 |

<sup>a</sup>Data were total non-refractory mass concentration from a high-resolution time-of-flight aerosol mass spectrometer (HR-ToF-AMS, Aerodyne Research Inc.) or an aerosol chemical speciation monitor (ACSM, Aerodyne Research Inc.).

**Table S2.** Deposition parameters and instrumental parameters at different locations and different seasons.

| Name  | Total inlet flow (L/min)/<br>Residence time (s) |  | Deposition<br>time (min) | Mass loading<br>( $\mu\text{g}$ ) <sup>c</sup> | FIGAERO type/<br>Sample mode | IMR<br>body T<br>(°C) | IMR<br>pressure<br>(mbar) | Ion<br>source       | Ratio<br>sample flow :<br>ionizer flow | Ramp<br>rate<br>(°C/min) |
|-------|-------------------------------------------------|--|--------------------------|------------------------------------------------|------------------------------|-----------------------|---------------------------|---------------------|----------------------------------------|--------------------------|
|       |                                                 |  |                          |                                                |                              |                       |                           |                     |                                        |                          |
| MCC-t | 7.0/1.4                                         |  | 120                      | 0.3±0.3                                        | Aerodyne/online              | 45                    | 100                       | Corona<br>discharge | 2:1.3                                  | 13.3                     |
| MCC-d | 7.0/1.4                                         |  | 120                      | 0.4±0.4                                        | Aerodyne/online              | 45                    | 480                       | X-ray               | 2:1.3                                  | 13.3                     |
| REL   | 8.6/1.2                                         |  | 30                       | 1.0±0.7                                        | Aerodyne/online              | 45                    | 100                       | Po-210              | 2:2                                    | 13.3                     |
| RAB   | 22/3.6                                          |  | 20                       | 1.8±1.3                                        | UW/online <sup>d</sup>       | 25                    | 100                       | Po-210              | 2:2                                    | 10.0                     |
| RHT   | 11/4.2                                          |  | 30                       | 0.5±0.8                                        | UW/online <sup>d</sup>       | 25                    | 100                       | Po-210              | 2:2                                    | 10.0                     |
| UST-s | 8.7/0.8                                         |  | 112±43 <sup>b</sup>      | 3.5±1.4                                        | Aerodyne/offline             | 45                    | 100                       | Po-210              | 2:2                                    | 13.3                     |
| UST-w | 10.0/0.7                                        |  | 86±70 <sup>b</sup>       | 4.0±1.0                                        | Aerodyne/offline             | 45                    | 100                       | Po-210              | 2:2                                    | 13.3                     |
| UKA-s | 6.4/0.8                                         |  | 128±99 <sup>b</sup>      | 3.2±2.1                                        | Aerodyne/offline             | 45                    | 100                       | Po-210              | 2:2                                    | 13.3                     |
| UKA-w | 6.4/0.8                                         |  | 245±124 <sup>b</sup>     | 3.0±1.5                                        | Aerodyne/offline             | 45                    | 100                       | Po-210              | 2:2                                    | 13.3                     |
| UDL   | 2.4 <sup>a</sup> /2.8                           |  | 3±1                      | 0.6±0.5                                        | Aerodyne/online              | 25                    | 250                       | X-ray               | 2:1.5                                  | 6.7                      |

<sup>a</sup>Average inlet flow of 3.5 L/min for the 1<sup>st</sup> week and 2 L/min for the next 2.5 weeks.

<sup>b</sup>Deposition time was average ± 1 standard deviation from offline filters.

<sup>c</sup>Mass loadings were calculated based on concurrent HR-ToF-AMS or ACSM measurements.

<sup>d</sup>FIGAERO inlet from the University of Washington, U.S., designed by Lopez-Hilfiker et al. (2014).

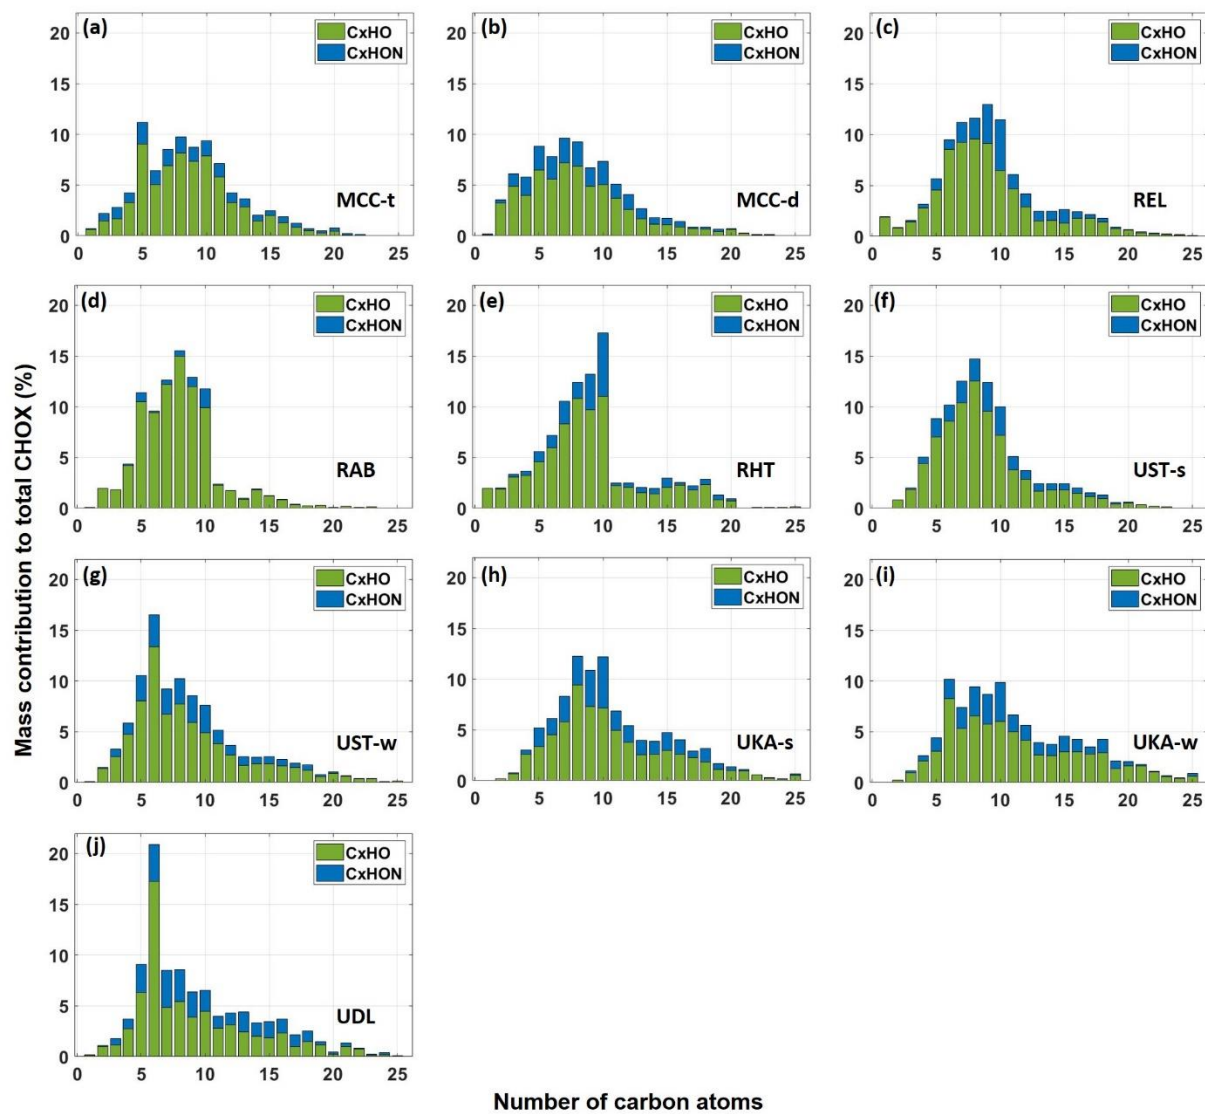

30 **Figure S1.** Mass contributions of CHO and CHON compounds to total CHOX compounds as a function of the number of carbon atoms for MCC-t (a), MCC-d (b), REL (c), RAB (d), RHT (e), UST-s (f), UST-w (g), UKA-s (h), UKA-w (i), and UDL (j).

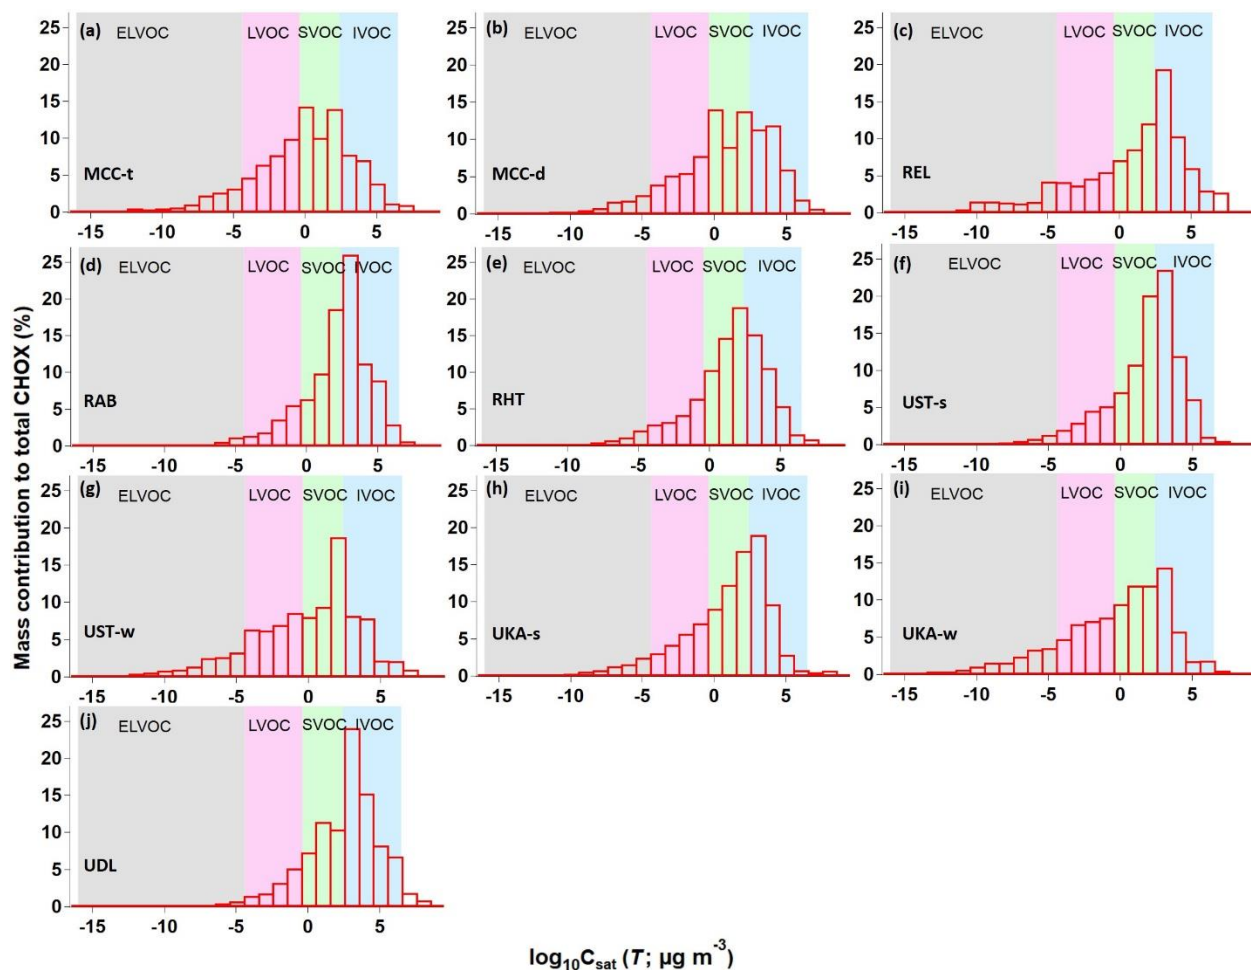

**Figure S2.** Volatility distribution for MCC-t (a), MCC-d (b), REL (c), RAB (d), RHT (e), UST-s (f), UST-w (g), UKA-s (h), UKA-w (i), and UDL (j) with the modified Li et al. (2016) parameterization method (Daumit et al., 2013; Isaacman-VanWertz and Aumont, 2021).

35

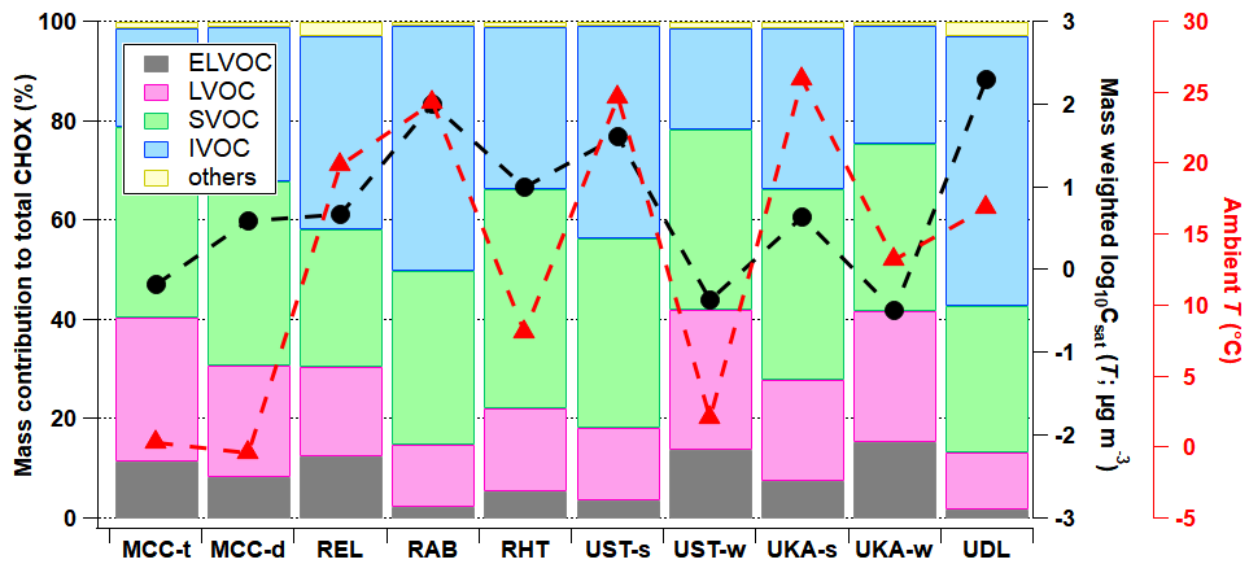

**Figure S3.** Comparison between ambient temperature ( $T$ ) and campaign-average contribution (%) of different volatility groups resulting from VBS calculations to total organics (colored in bars) and campaign-average mass weighted  $\log_{10}C_{\text{sat}}(T)$  values (in black markers) for different campaigns with the modified Li et al. (2016) parameterization method (Daumit et al., 2013; Isaacman-VanWertz and Aumont, 2021) (same as Figure 2). Compounds more volatile than IVOC with  $C_{\text{sat}}$  higher than  $10^{6.5} \mu\text{g m}^{-3}$  (labelled as “others”) contributed negligibly (0.8–2.9%).

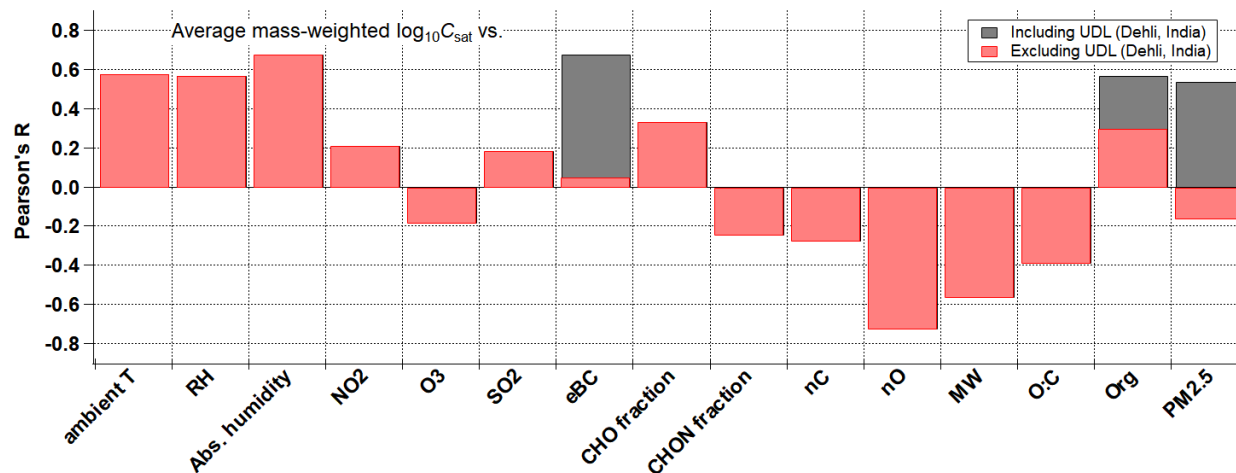

**Figure S4.** Correlations of campaign-average mass weighted  $\log_{10}C_{\text{sat}}$  values vs. other parameters. Pearson's R values including and excluding UDL (Dehli, India) data point for eBC, Org, and PM<sub>2.5</sub> are in gray bars and red bars, respectively, due to their extremely high levels at UDL (see Table S1).

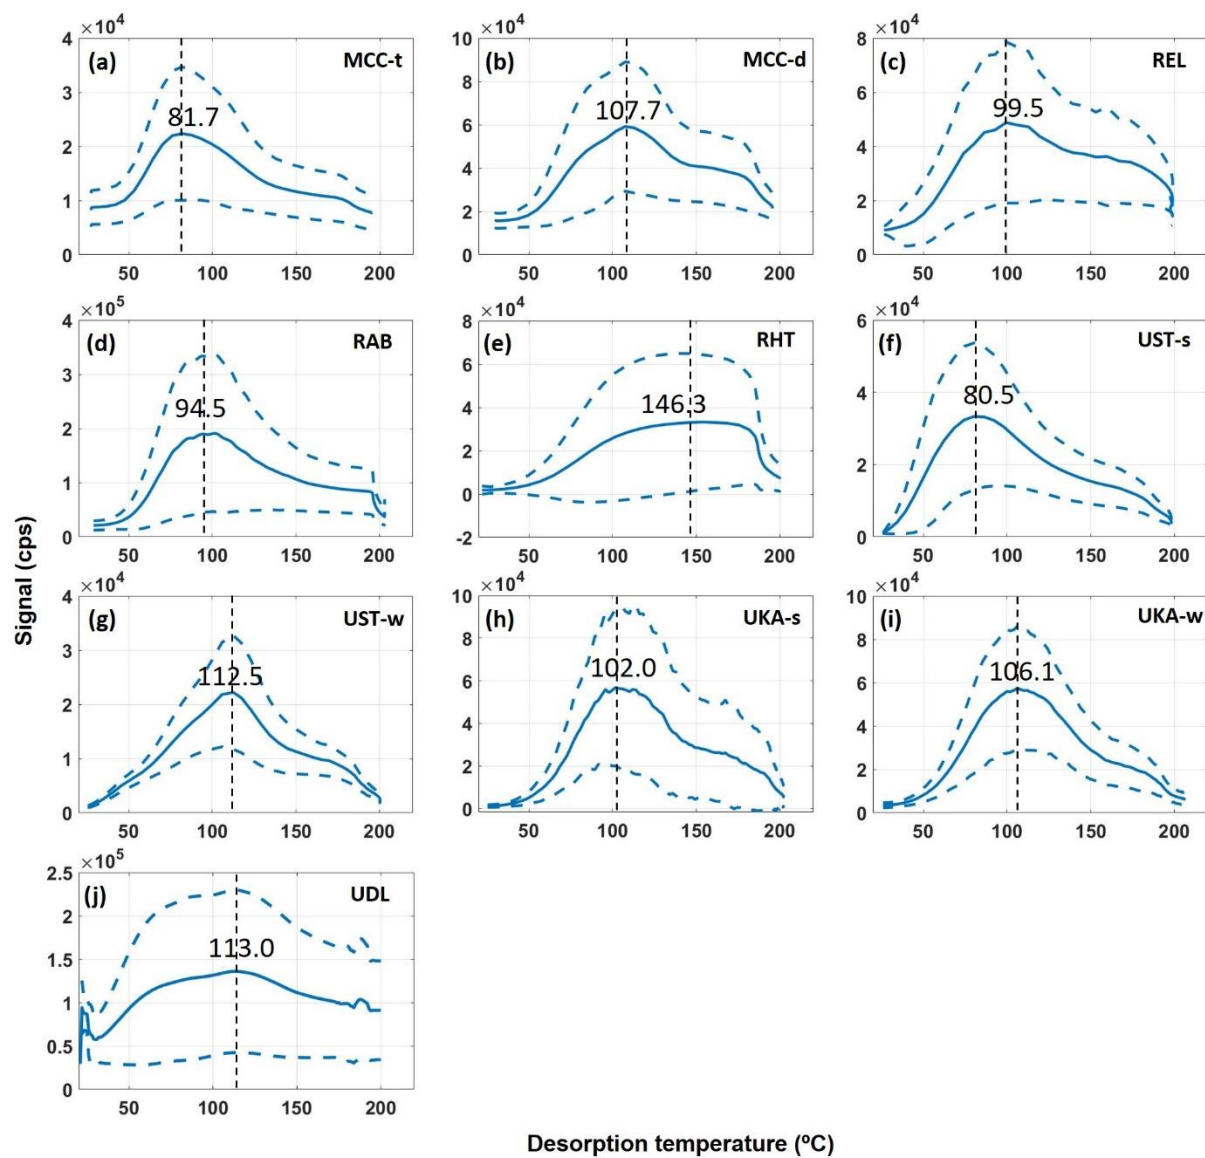

**Figure S5.** Campaign-average sum thermograms of CHOX compounds for MCC-t (a), MCC-d (b), REL (c), RAB (d), RHT (e), UST-s (f), UST-w (g), UKA-s (h), UKA-w (i), and UDL (j). Dashed blue lines represent  $\pm 1$  standard deviation and dashed black lines indicate the  $\text{sumT}_{\text{max}}$  values.

50



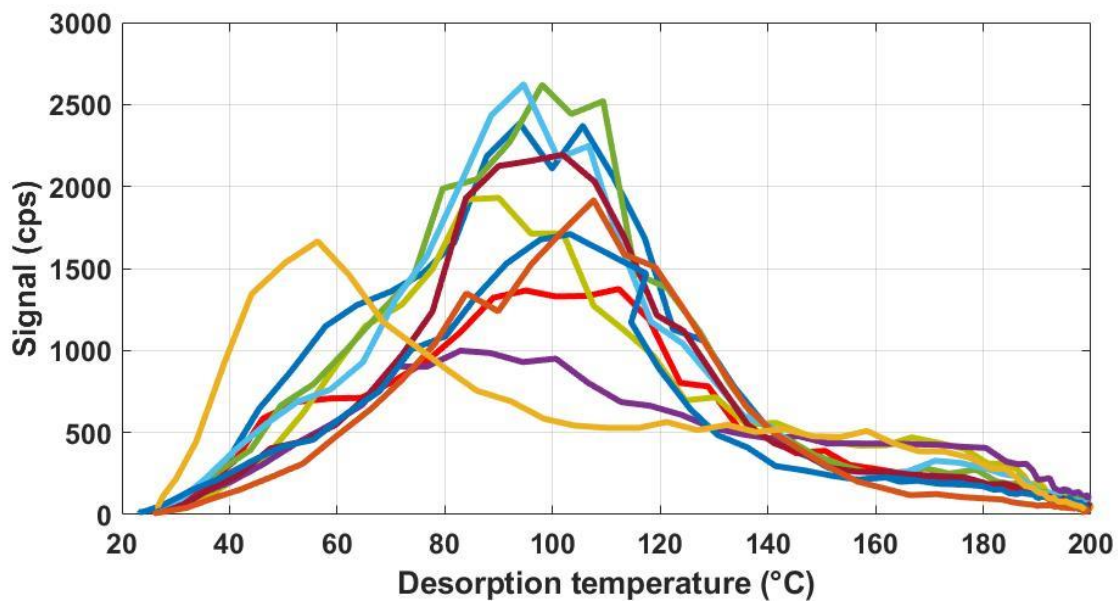

**Figure S6.** Thermograms of  $C_6H_{10}O_5$  compound during the whole campaign in winter Stuttgart (UST-w).

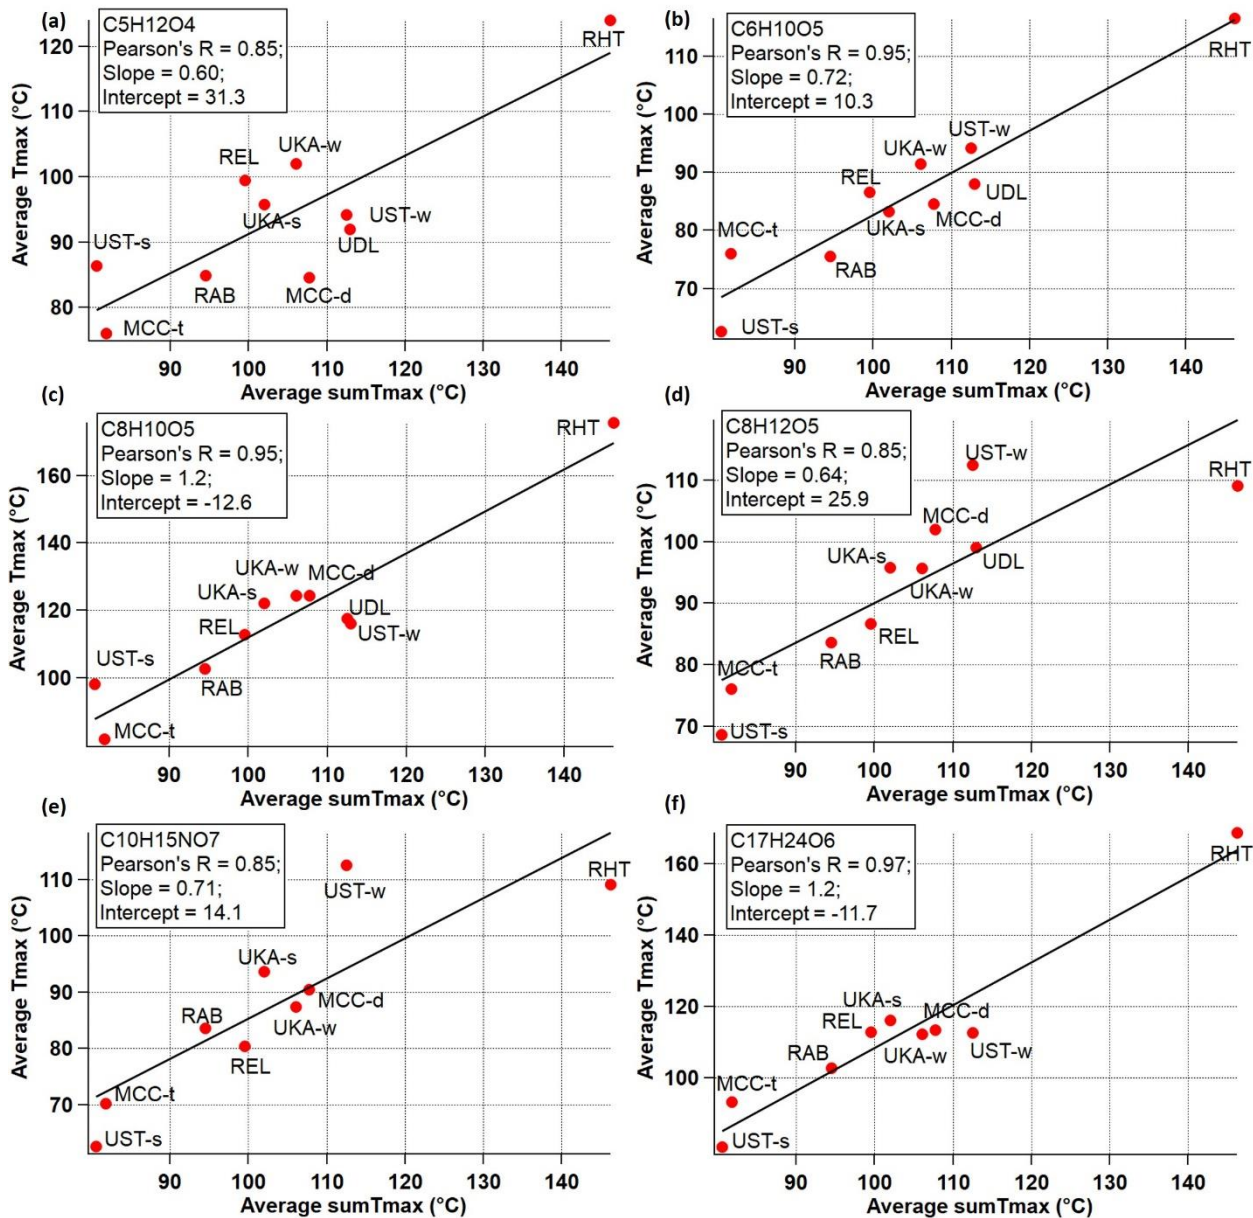

**Figure S7.** Campaign-average  $T_{\max}$  values for  $\text{C}_5\text{H}_{12}\text{O}_4$  (a),  $\text{C}_6\text{H}_{10}\text{O}_5$  (b),  $\text{C}_8\text{H}_{10}\text{O}_5$  (c),  $\text{C}_8\text{H}_{12}\text{O}_5$  (d),  $\text{C}_{10}\text{H}_{15}\text{NO}_7$  (e), and  $\text{C}_{17}\text{H}_{24}\text{O}_6$  (f) vs. the corresponding campaign-average  $\text{sum}T_{\max}$  values.

55

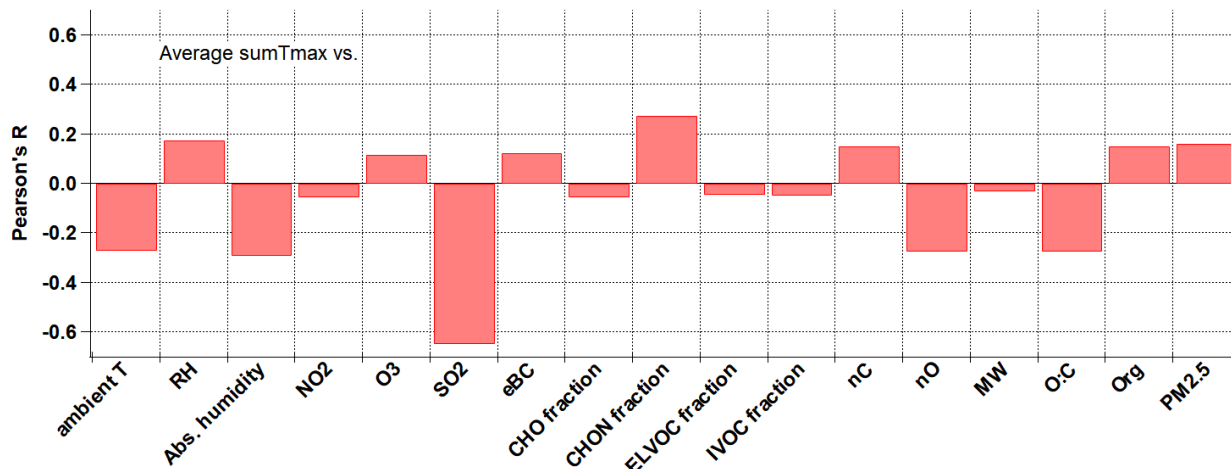

**Figure S8.** Correlations of campaign-average sumT<sub>max</sub> values vs. other parameters.

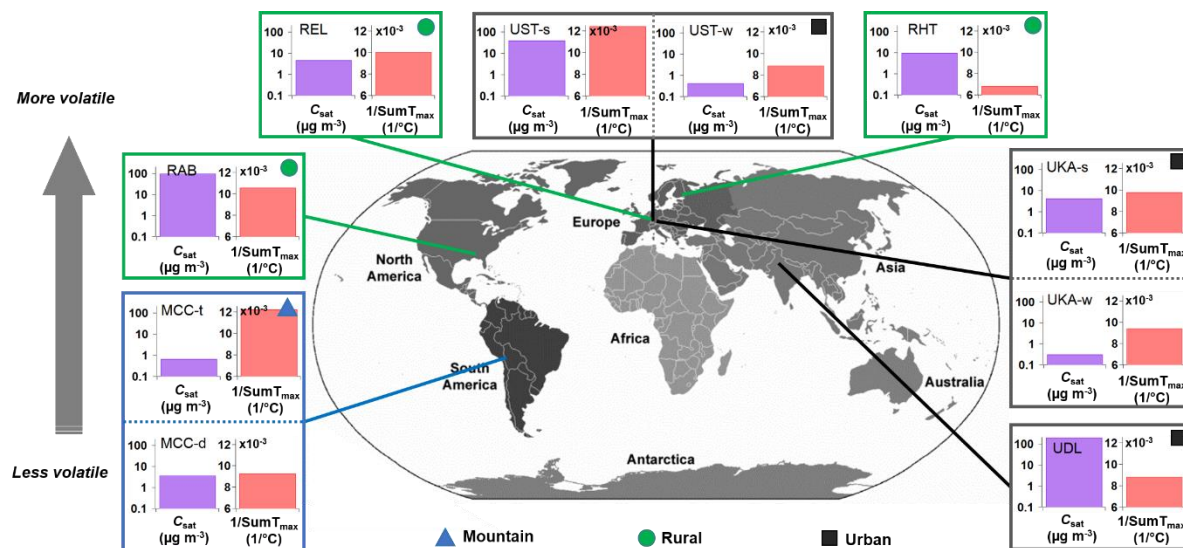

60 **Figure S9.** Overview of the comparison of the average  $C_{sat}(T)$  (i.e., molecular composition-derived volatility) with the  $\text{sumT}_{max}$  (i.e., thermal desorption-derived volatility) for different locations and seasons (Mountain sites in triangles, Rural sites in circles, and Urban sites in squares).

## References

- Daumit, K. E., Kessler, S. H., and Kroll, J. H.: Average chemical properties and potential formation pathways of highly oxidized organic aerosol, *Faraday Discuss*, 165, 181-202, <https://doi.org/10.1039/C3FD00045A>, 2013.
- 65 Isaacman-VanWertz, G., and Aumont, B.: Impact of organic molecular structure on the estimation of atmospherically relevant physicochemical parameters, *Atmos Chem Phys*, 21, 6541–6563, <https://doi.org/10.5194/acp-21-6541-2021>, 2021.
- Li, Y., Pöschl, U., and Shiraiwa, M.: Molecular corridors and parameterizations of volatility in the chemical evolution of organic aerosols, *Atmos Chem Phys*, 16, 3327–3344, <https://doi.org/10.5194/acp-16-3327-2016>, 2016.
- 70 Lopez-Hilfiker, F. D., Mohr, C., Ehn, M., Rubach, F., Kleist, E., Wildt, J., Mentel, T. F., Lutz, A., Hallquist, M., Worsnop, D., and Thornton, J. A.: A novel method for online analysis of gas and particle composition: description and evaluation of a Filter Inlet for Gases and AEROsols (FIGAERO), *Atmos Meas Tech*, 7, 983–1001, <https://doi.org/10.5194/amt-7-983-2014>, 2014.
